# Supplementary material
Source: publisher figshare collection journal article supplement (https://tandf.figshare.com/ndownloader/files/8119784)
Supplement: Supplementary file 1 [file 8119784]

## SUPPLEMENTARY MATERIAL

### A new cycloartane triterpenoid glycoside from *Souliea vaginata*

Hai-Feng Wu<sup>b,‡</sup>, Xin Liu<sup>c,‡</sup>, Yin-Di Zhu<sup>d</sup>, Jing Zhou<sup>a,b</sup>, Ying-Ying Gong<sup>a,b</sup>, Guo-Xu Ma<sup>b</sup>, Xu-Dong Xu<sup>b</sup>, Yi-Lin Liu<sup>a</sup>, Zheng-Hong Luo<sup>a</sup>, Di-Zhao Chen<sup>a</sup>, Qiong-Yu Zou<sup>a,\*</sup> and Zi-Jian Zhao<sup>a,\*</sup>

<sup>a</sup> *Key Laboratory of Hunan Province for Study and Utilization of Ethnic Medicinal Plant Resources, Department of Chemistry & Chemical Engineering, Huaihua University, Huaihua 418008, China*

<sup>b</sup> *Key Laboratory of Bioactive Substances and Resources Utilization of Chinese Herbal Medicine, Ministry of Education, Institute of Medicinal Plant Development, Chinese Academy of Medical Sciences and Peking Union Medical College, Beijing 100193, China*

<sup>c</sup> *Beijing Entry-Exit Inspection and Quarantine Bureau, Beijing 100026, China*

<sup>d</sup> *School of Pharmacy, Wenzhou Medical University, Wenzhou 325035, P.R. China*

Corresponding authors at: Key Laboratory of Hunan Province for Study and Utilization of Ethnic Medicinal Plant Resources, Department of Chemistry & Chemical Engineering, Huaihua University, China. Address: No. 612, Yingfeng East Road, Hecheng District, Huaihua, China. Tel.: +86 745 2851014; Fax: +86 745 2851014. E-mail address: zouqioyu@126.com (Q.-Y. Zou); zzj519519@126.com (Z.-J. Zhao).

**Abstract:** One new cycloartane triterpenoid glycoside, soulieoside Q (**1**), together with four known compounds (**2–5**) were isolated from the ethanolic extract of the rhizomes

---

\* Corresponding author. E-mail: [zouqioyu@126.com](mailto:zouqioyu@126.com); [zzj519519@126.com](mailto:zzj519519@126.com).

‡ These two authors contributed equally to this work.

of *Souliea vaginata* Maxim. The structure of the new compound was determined by extensive spectroscopic analysis including 1D- and 2D-NMR and HRESIMS, as well as chemical methods. Compound **1** was evaluated for its cytotoxic activities against HepG2 and A549 cancer cell lines.

**Keywords:** *Souliea vaginata*; Ranunculaceae; cycloartane triterpenoid glycoside

## List of Contents

**Table S1.**  $^1\text{H}$  and  $^{13}\text{C}$  NMR spectroscopic data of **1** (600 and 150 MHz, pyridine- $d_5$ ).

**Figure S1.** The Key HMBC ( $\longrightarrow$ ), NOESY ( $\longleftrightarrow$ ) and  $^1\text{H}$ - $^1\text{H}$  COSY ( $\longrightarrow$ ) correlations of **1**.

**Figure S2.** The  $^1\text{H}$  NMR (600 MHz, pyridine- $d_5$ ) spectrum of the new compound **1**.

**Figure S3.** The  $^{13}\text{C}$  NMR (APT, 150 MHz, pyridine- $d_5$ ) spectrum of the new compound **1**.

**Figure S4.** The HSQC spectrum of the new compound **1**.

**Figure S5.** The  $^1\text{H}$ - $^1\text{H}$  COSY spectrum of the new compound **1**.

**Figure S6.** The TOCSY spectrum of the new compound **1**.

**Figure S7.** The HSQC-TOCSY spectrum of the new compound **1**.

**Figure S8.** The HMBC spectrum of the new compound **1**.

**Figure S9.** The NOESY spectrum of the new compound **1**.

**Figure S10.** The HRESIMS spectrum of the new compound **1**.

**Figure S11.** The  $^1\text{H}$  NMR (600 MHz, pyridine- $d_5$ ) spectrum of the known compound **2**.

**Figure S12.** The  $^{13}\text{C}$  NMR (150 MHz, pyridine- $d_5$ ) spectrum of the known compound **2**.

**Figure S13.** The  $^1\text{H}$  NMR (600 MHz, pyridine- $d_5$ ) spectrum of the known compound **3**.

**Figure S14.** The  $^{13}\text{C}$  NMR (150 MHz, pyridine- $d_5$ ) spectrum of the known compound **3**.

**Figure S15.** The  $^1\text{H}$  NMR (600 MHz, pyridine- $d_5$ ) spectrum of the known compound **4**.

**Figure S16.** The  $^{13}\text{C}$  NMR (150 MHz, pyridine- $d_5$ ) spectrum of the known compound **4**.

**Figure S17.** The  $^1\text{H}$  NMR (600 MHz, pyridine- $d_5$ ) spectrum of the known compound **5**.

**Figure S18.** The  $^{13}\text{C}$  NMR (150 MHz, pyridine- $d_5$ ) spectrum of the known compound **5**.

**Table S1.**  $^1\text{H}$  and  $^{13}\text{C}$  NMR spectroscopic data of **1** (600 and 150 MHz, pyridine- $d_5$ ).

| No. | $\delta_{\text{H}}$ (J in Hz)              | $\delta_{\text{C}}$ , type | No.      | $\delta_{\text{H}}$ (J in Hz)            | $\delta_{\text{C}}$ , type |
|-----|--------------------------------------------|----------------------------|----------|------------------------------------------|----------------------------|
| 1   | 1.20, m; 1.54, m                           | 32.7, CH <sub>2</sub>      | 25       |                                          | 70.6, C                    |
| 2   | 1.95, m; 2.29 m                            | 30.6, CH <sub>2</sub>      | 26       | 1.52, s                                  | 28.6, CH <sub>3</sub>      |
| 3   | 3.44, dd (11.4, 4.2)                       | 88.8, CH                   | 27       | 1.28, s                                  | 27.3, CH <sub>3</sub>      |
| 4   |                                            | 41.8, C                    | 28       | 1.43, s                                  | 26.2, CH <sub>3</sub>      |
| 5   | 1.61, d (6.0)                              | 48.4, CH                   | 29       | 1.27, s                                  | 16.3, CH <sub>3</sub>      |
| 6   | 1.49, m; 0.64, q (12.0)                    | 21.4, CH <sub>2</sub>      | 30       | 0.89, s                                  | 20.9, CH <sub>3</sub>      |
| 7   | 1.22, m; 0.99, m                           | 26.9, CH <sub>2</sub>      | Xyl-1'   | 4.83, d (7.2)                            | 106.5, CH                  |
| 8   | 1.27, m                                    | 48.4, CH                   | 2'       | 4.24, m                                  | 77.4, CH                   |
| 9   |                                            | 20.0, C                    | 3'       | 4.14, m                                  | 80.2, CH                   |
| 10  |                                            | 26.8, C                    | 4'       | 4.14, m                                  | 72.0, CH                   |
| 11  | 1.09, m; 1.97, m                           | 27.0, CH <sub>2</sub>      | 5'       | 4.29, m; 3.66, m                         | 67.5, CH <sub>2</sub>      |
| 12  | 1.68, m; 1.81, m                           | 34.2, CH <sub>2</sub>      | Rha-1''  | 6.55, s                                  | 102.0, CH                  |
| 13  |                                            | 47.2, C                    | 2''      | 5.05, br s                               | 72.2, CH                   |
| 14  |                                            | 47.1, C                    | 3''      | 4.88, dd (9.6, 3.0)                      | 83.9, CH                   |
| 15  | 2.98, dd (12.6, 7.8); 1.76, dd (12.6, 4.8) | 49.7, CH <sub>2</sub>      | 4''      | 4.54, t (9.6)                            | 73.5, CH                   |
| 16  | 4.81, m                                    | 73.3, CH                   | 5''      | 4.79, m                                  | 70.2, CH                   |
| 17  | 2.20, d (7.8)                              | 57.0, CH                   | 6''      | 1.64, d (6.0)                            | 19.1, CH <sub>3</sub>      |
| 18  | 1.66, s                                    | 21.9, CH <sub>3</sub>      | Glc-1''' | 5.52, d (7.8)                            | 107.4, CH                  |
| 19  | 0.24, d (4.0); 0.52, d (4.0)               | 30.8, CH <sub>2</sub>      | 2'''     | 4.11, m                                  | 76.4, CH                   |
| 20  |                                            | 87.1, C                    | 3'''     | 4.30, m                                  | 79.0, CH                   |
| 21  | 1.34, s                                    | 26.7, CH <sub>3</sub>      | 4'''     | 4.30, m                                  | 71.8, CH                   |
| 22  | 1.68, m; 2.49 m                            | 37.9, CH <sub>2</sub>      | 5'''     | 3.98, m                                  | 79.1, CH                   |
| 23  | 1.89, m; 2.24 m                            | 24.7, CH <sub>2</sub>      | 6'''     | 4.47 dd (12.0, 2.4), 4.40 dd (12.0, 4.2) | 62.8, CH <sub>2</sub>      |
| 24  | 3.94, t (7.2)                              | 85.3, CH                   |          |                                          |                            |

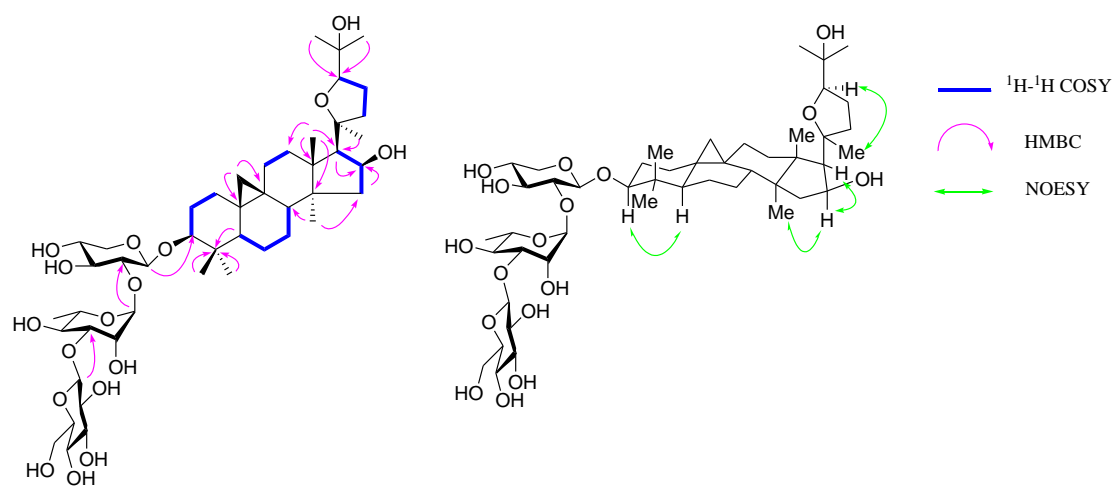

**Figure S1.** Key HMBC,  $^1\text{H}$ - $^1\text{H}$  COSY and NOESY correlations of **1**.

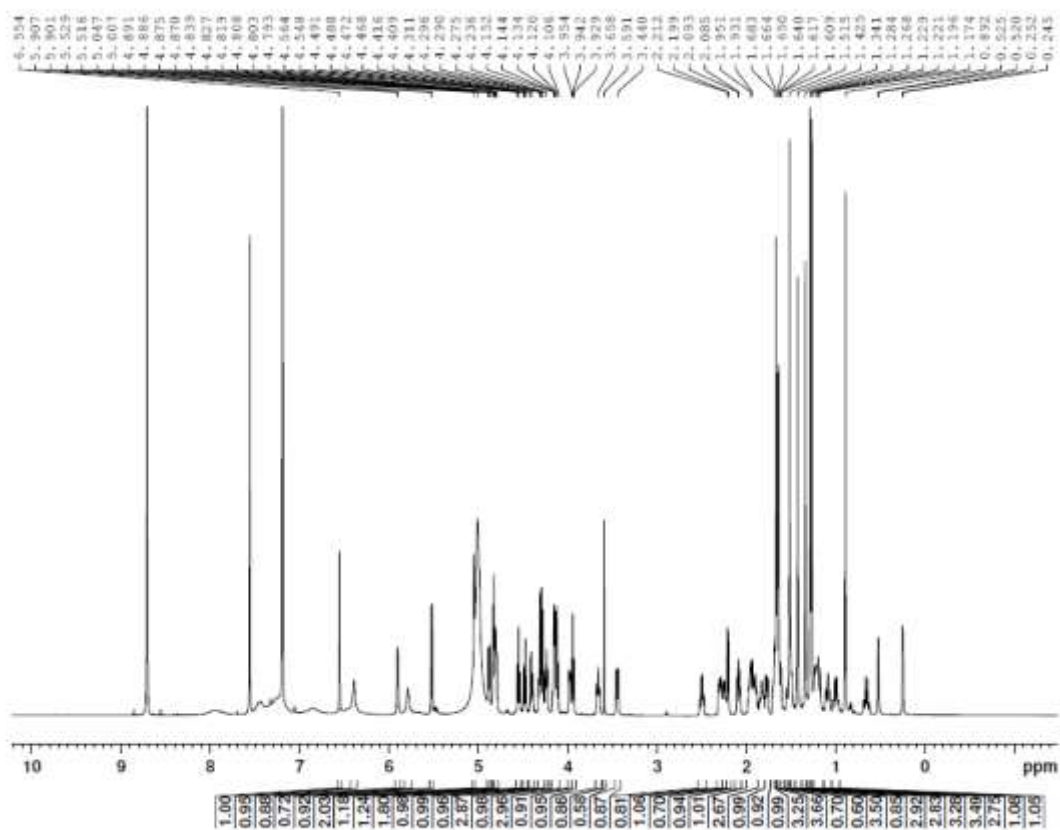

**Figure S2.** The  $^1\text{H}$  NMR (600 MHz,  $\text{pyridine-d}_5$ ) spectrum of the new compound **1**.

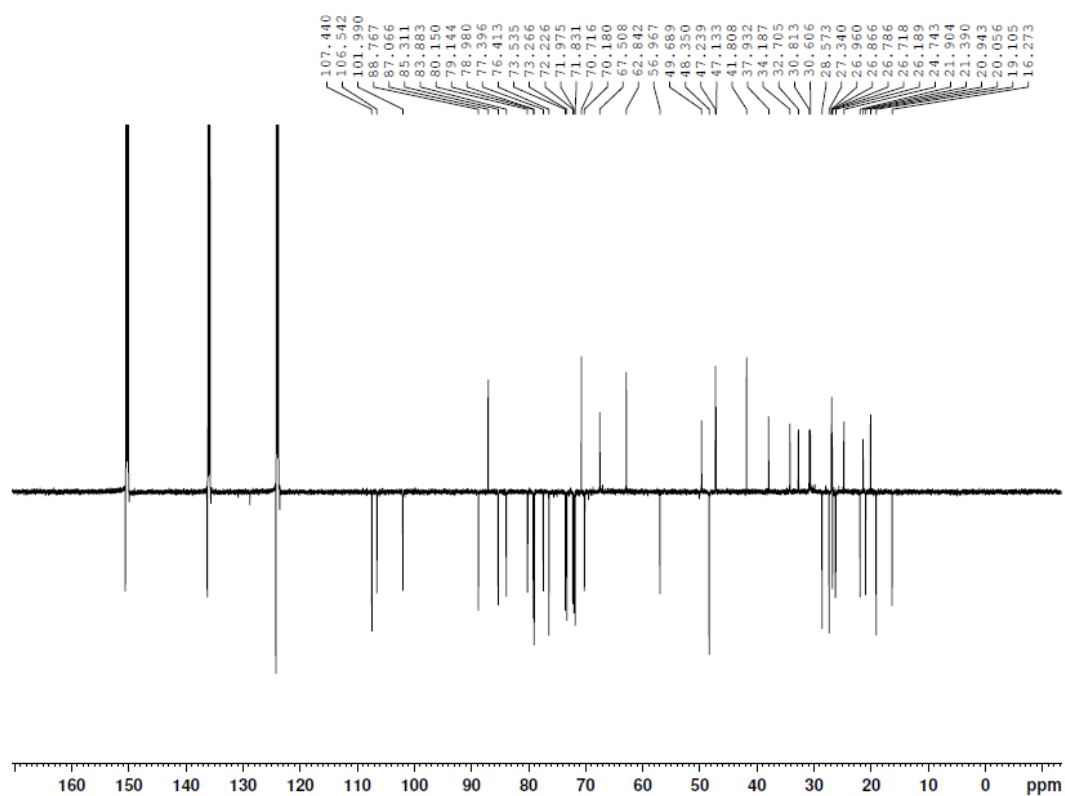

**Figure S3.** The  $^{13}\text{C}$  NMR (APT, 150 MHz, pyridine- $d_5$ ) spectrum of the new compound **1**.

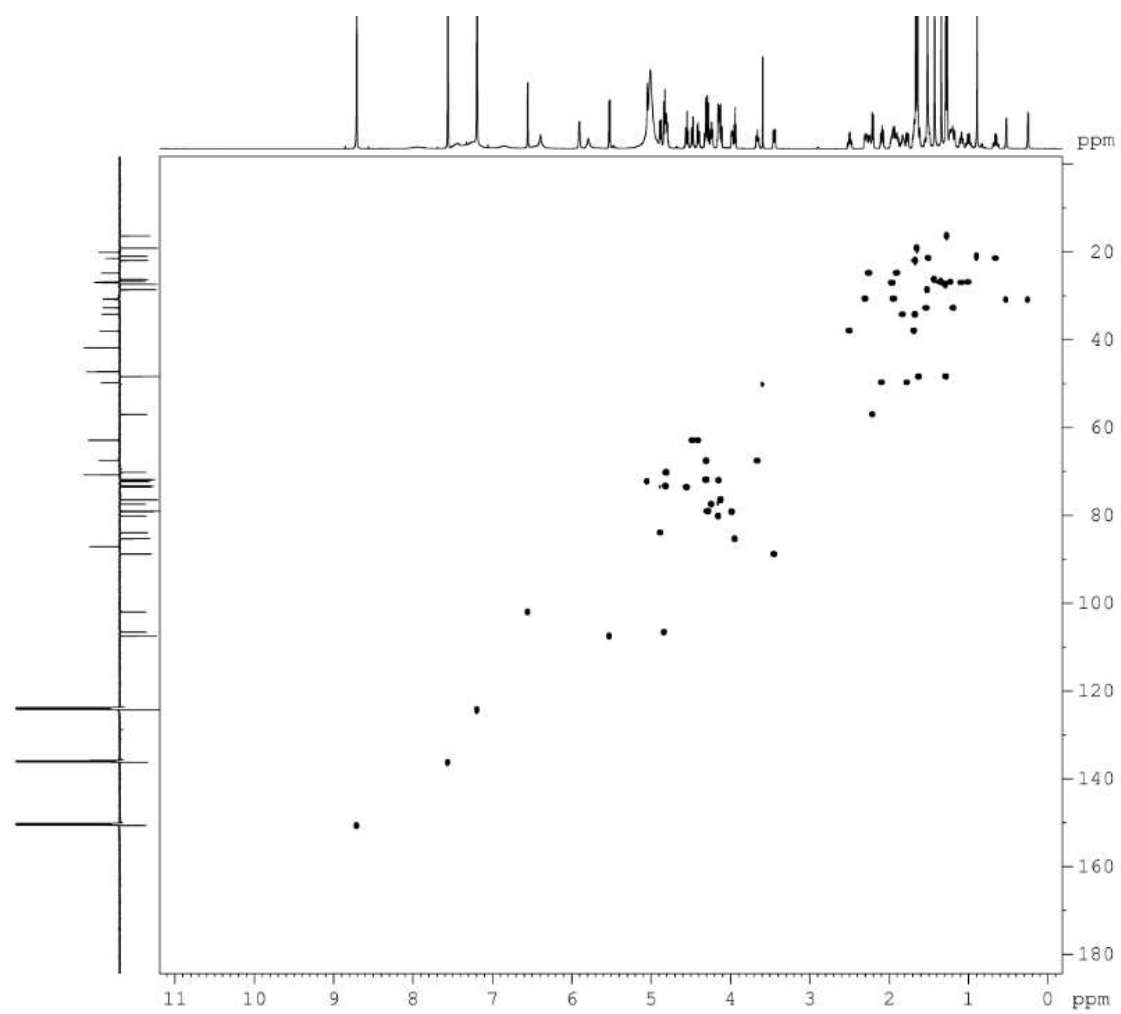

**Figure S4.** The HSQC spectrum of the new compound **1**.



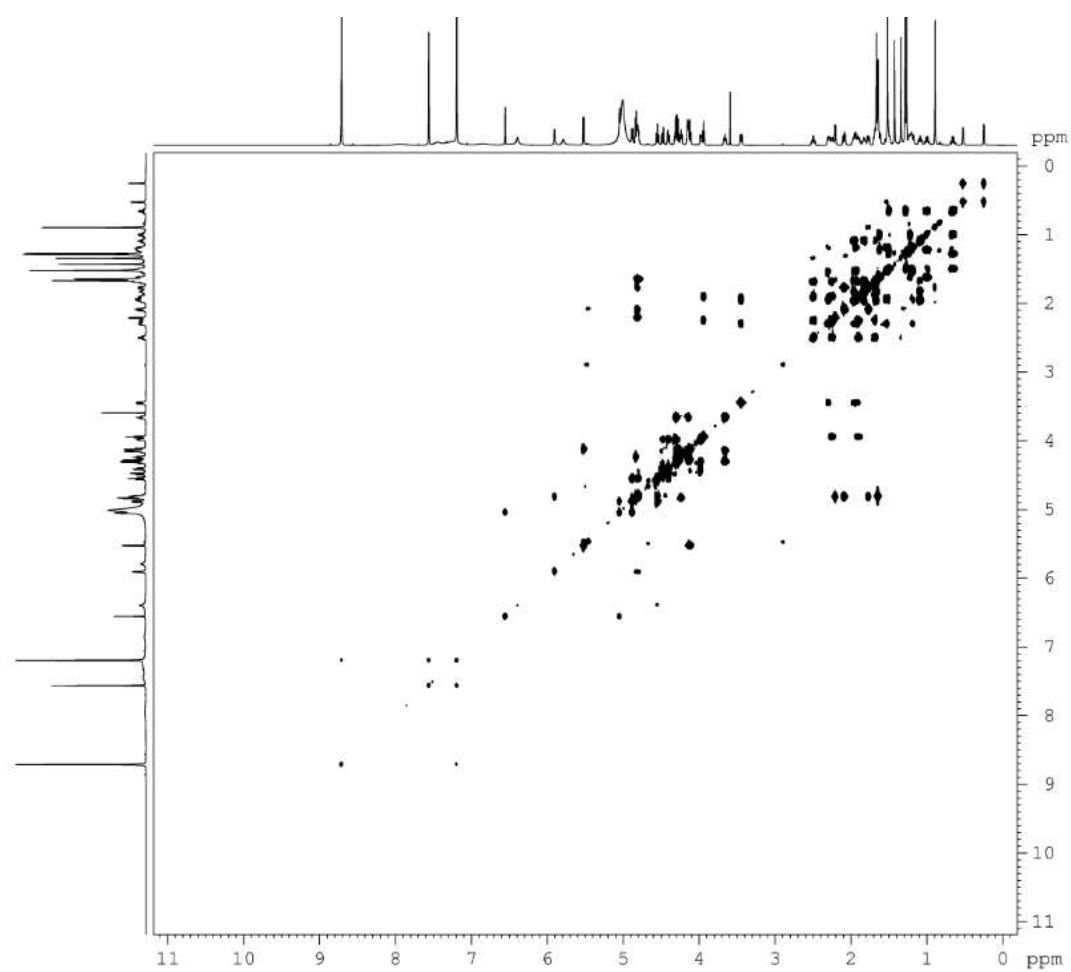

**Figure S5.** The  $^1\text{H}$ - $^1\text{H}$  COSY spectrum of the new compound **1**.

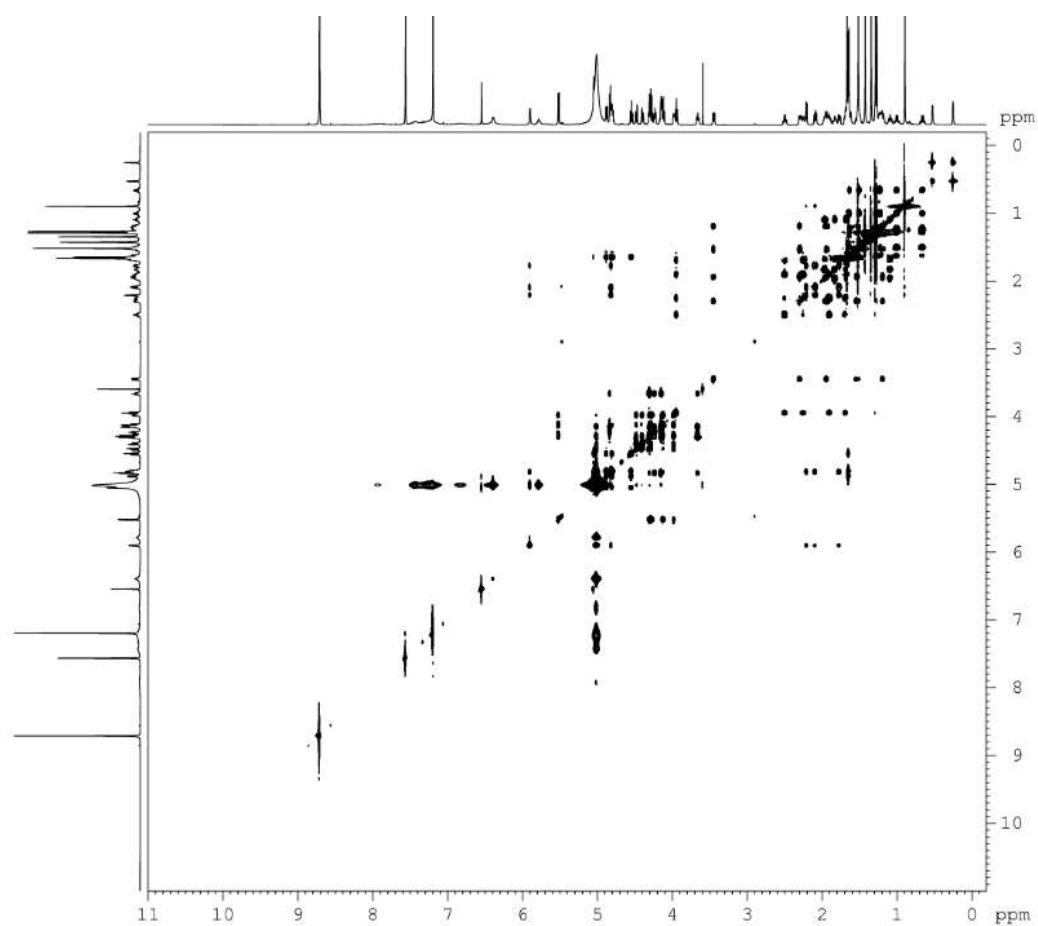

**Figure S6.** The TOCSY spectrum of the new compound **1**.

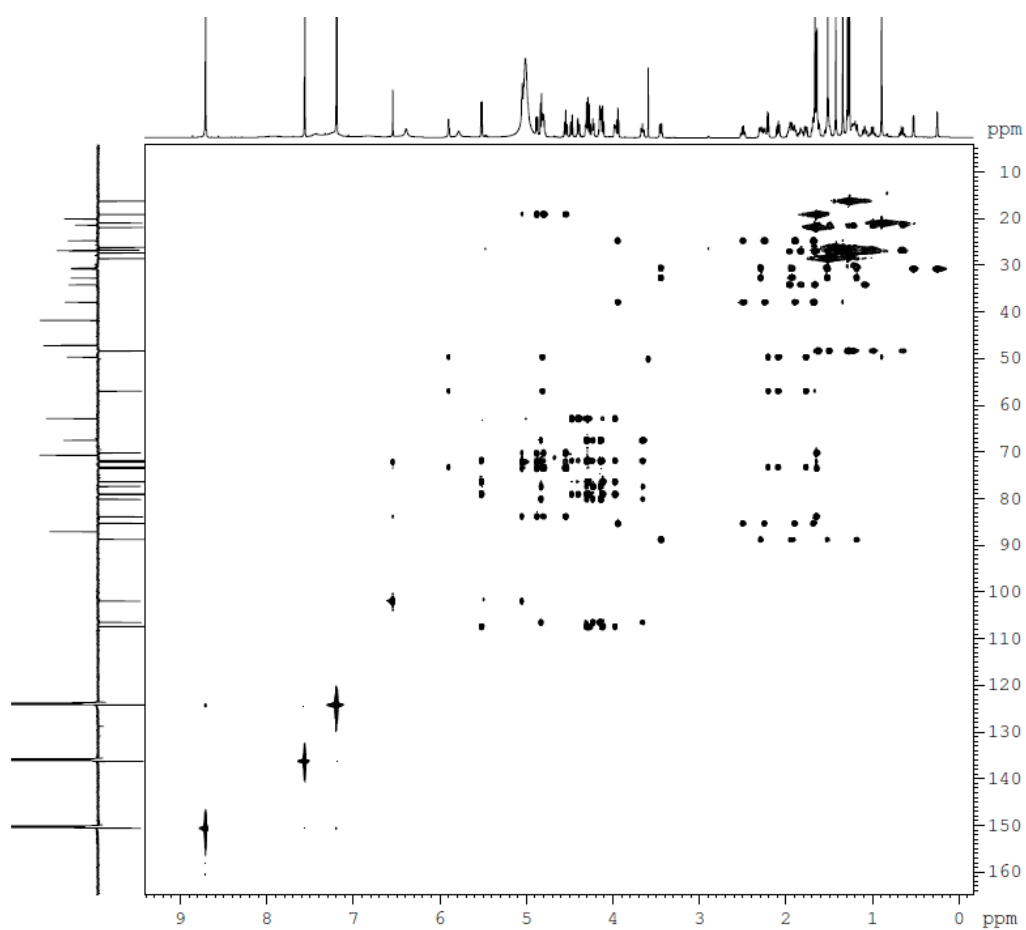

**Figure S7.** The HSQC-TOCSY spectrum of the new compound **1**.

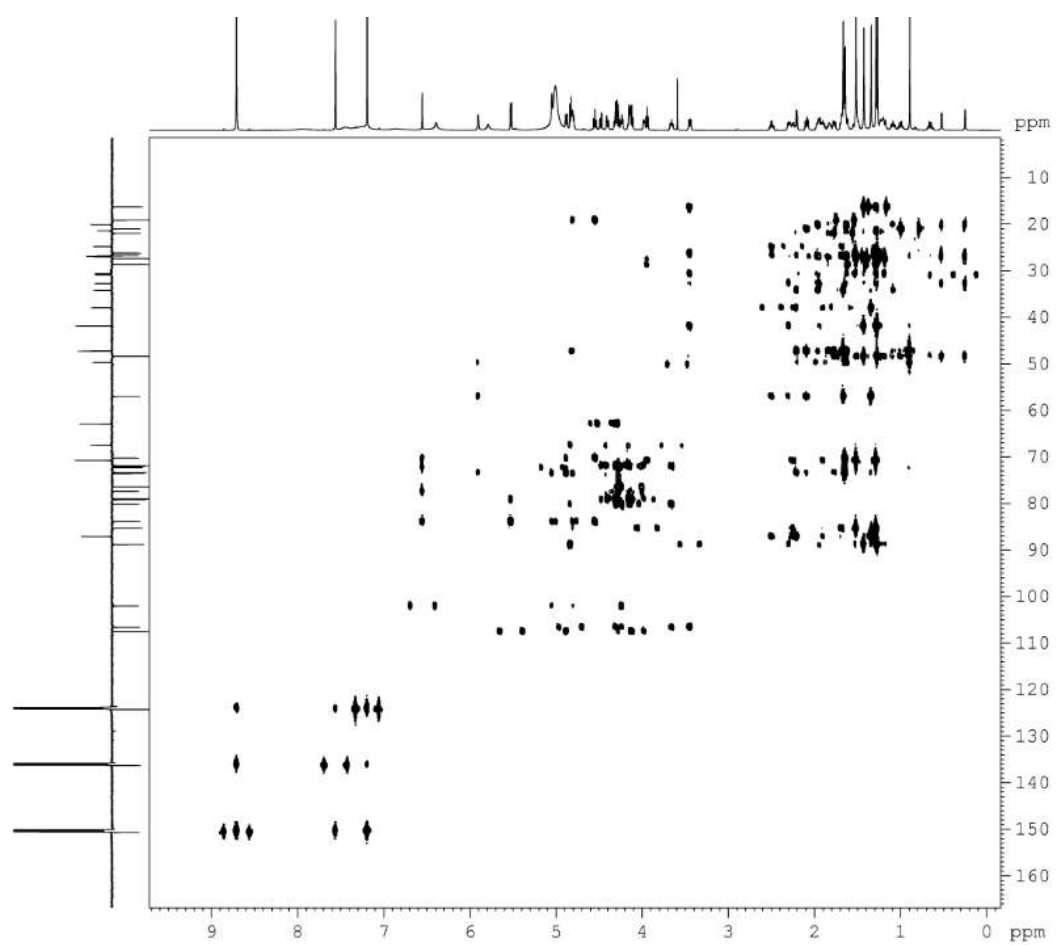

**Figure S8.** The HMBC spectrum of the new compound **1**.

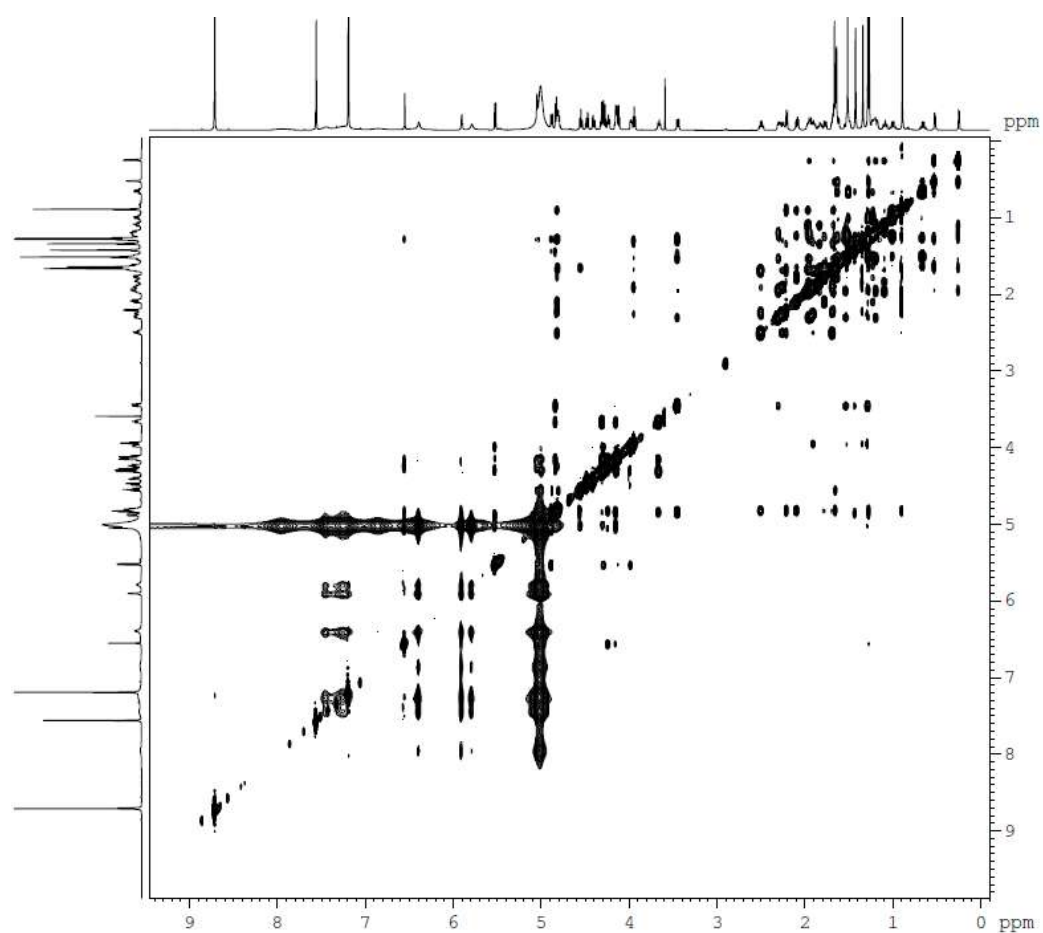

**Figure S9.** The NOESY spectrum of the new compound **1**.

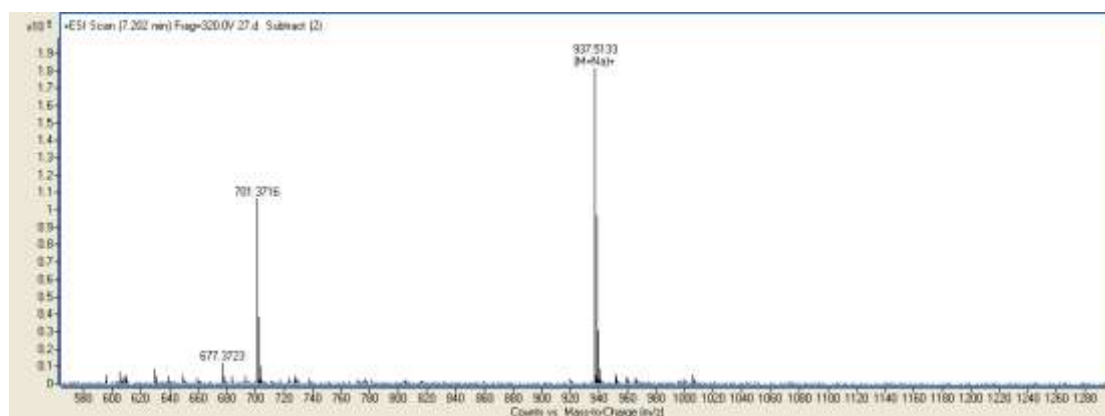

**Figure S10.** The HRESIMS spectrum of the new compound **1**.

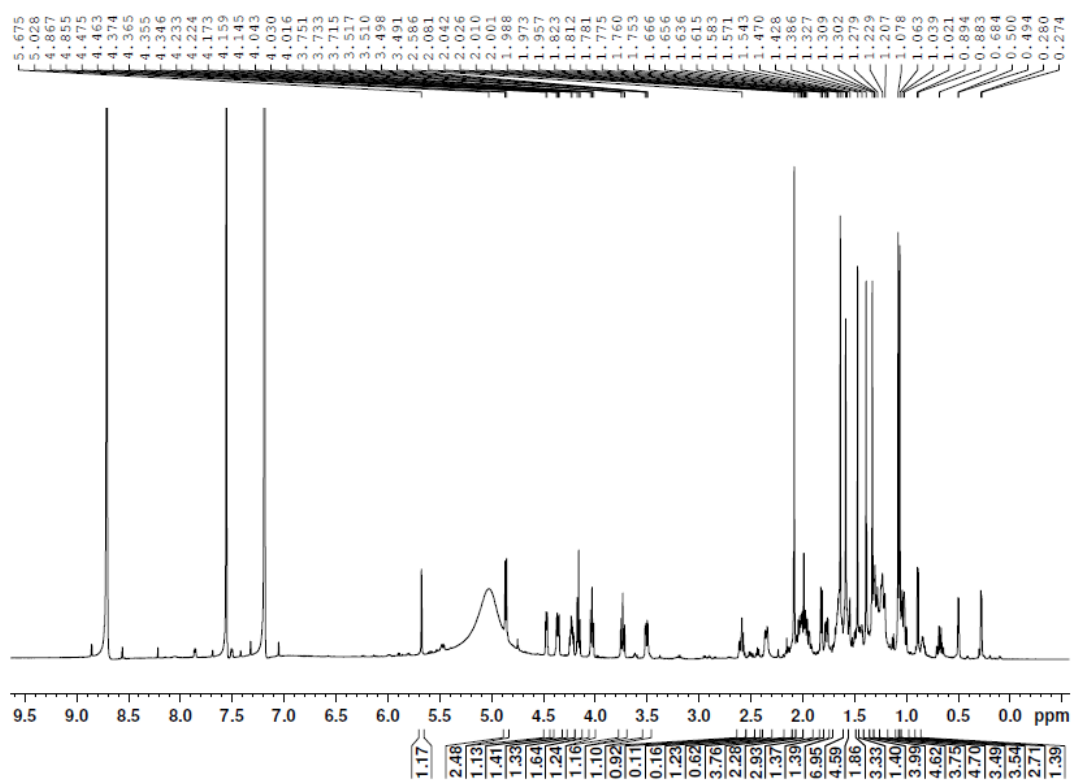

**Figure S11.** The <sup>1</sup>H NMR (600 MHz, pyridine-*d*<sub>5</sub>) spectrum of the known compound **2**.

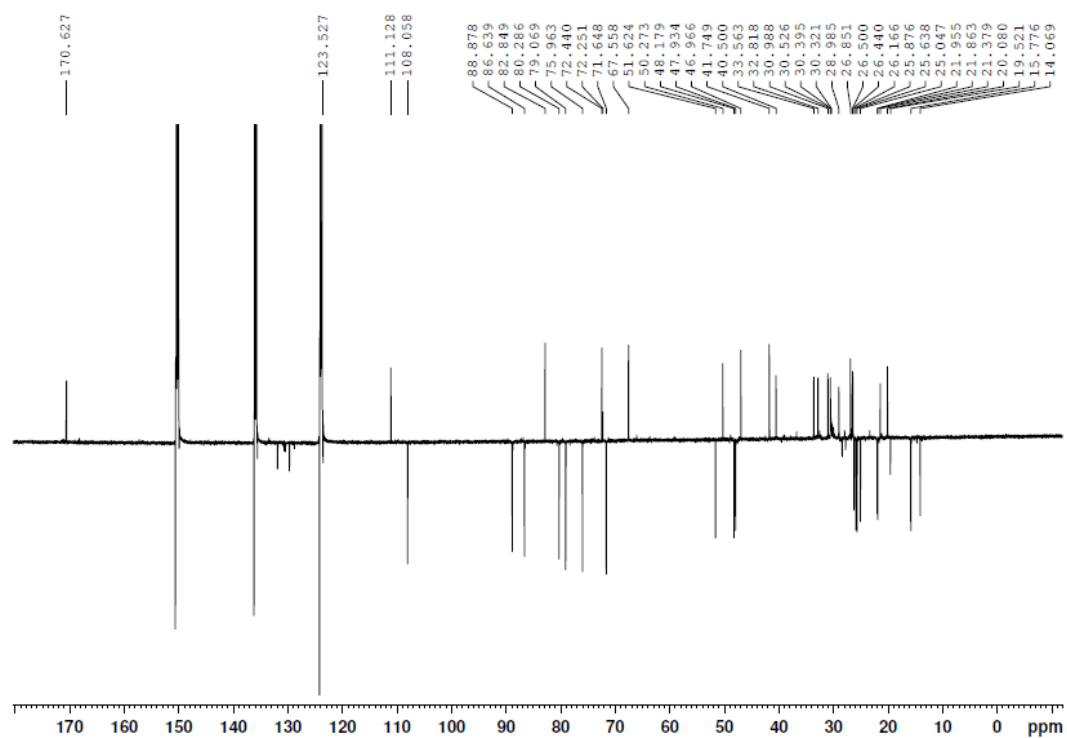

**Figure S12.** The  $^{13}\text{C}$  NMR (150 MHz, pyridine- $d_5$ ) spectrum of the known compound **2**.

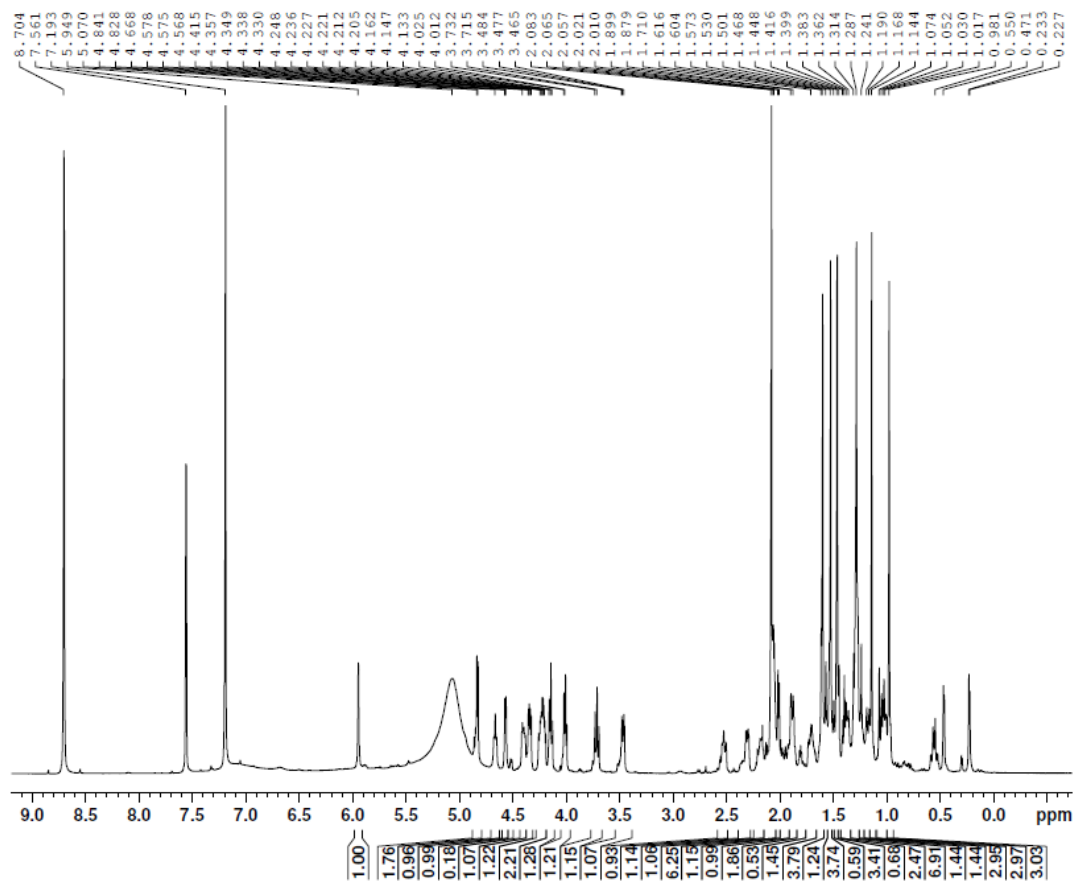

**Figure S13.** The  $^1\text{H}$  NMR (600 MHz, pyridine- $d_5$ ) spectrum of the known compound **3**.



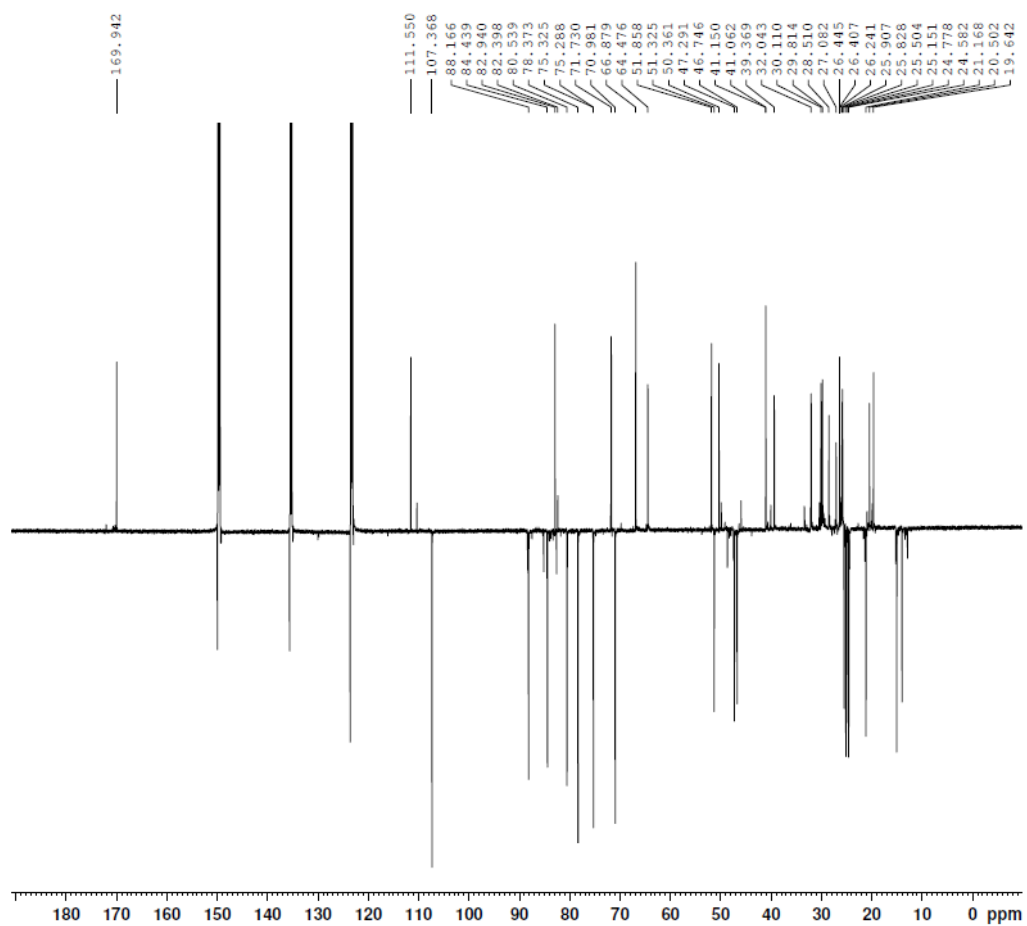

**Figure S14.** The  $^{13}\text{C}$  NMR (150 MHz, pyridine- $d_5$ ) spectrum of the known compound **3**.

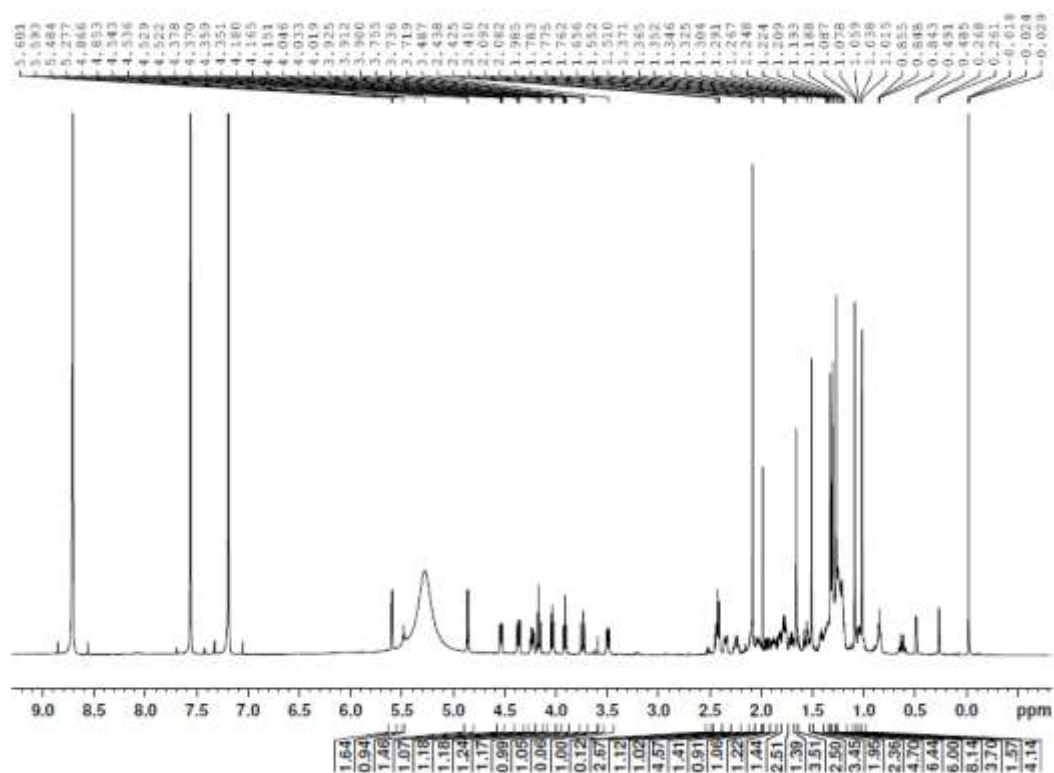

**Figure S15.** The  $^1\text{H}$  NMR (600 MHz, pyridine- $d_5$ ) spectrum of the known compound **4**.

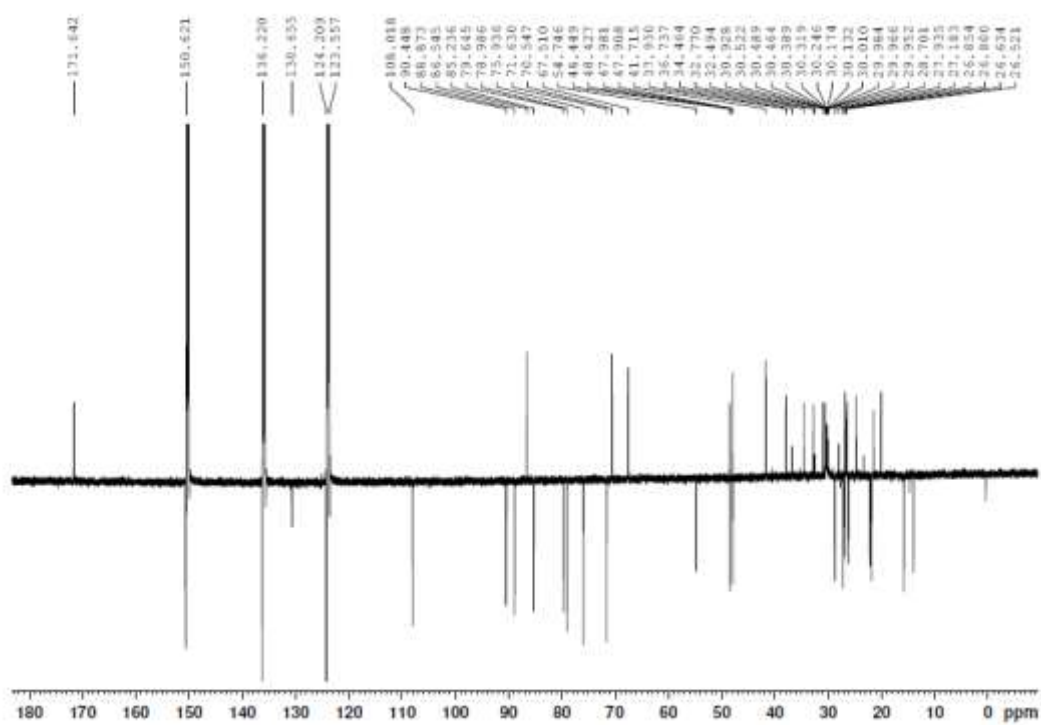

**Figure S16.** The  $^{13}\text{C}$  NMR (150 MHz, pyridine- $d_5$ ) spectrum of the known compound **4**.

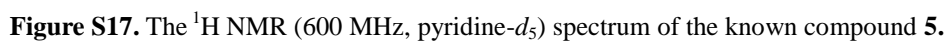

**Figure S17.** The  $^1\text{H}$  NMR (600 MHz, pyridine- $d_5$ ) spectrum of the known compound **5**.

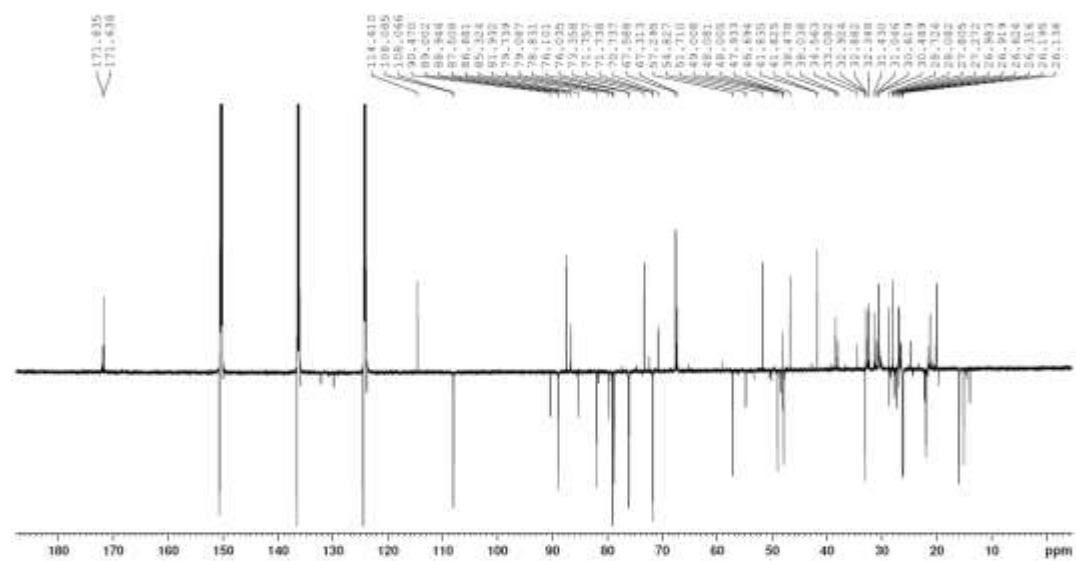

**Figure S18.** The  $^{13}\text{C}$  NMR (150 MHz, pyridine- $d_5$ ) spectrum of the known compound **5**.
